# Supplementary material for: Genotype Prevalence of Lactose Deficiency, Vitamin D Deficiency, and the Vitamin D Receptor in a Chilean Inflammatory Bowel Disease Cohort: Insights from an Observational Study
Source: MDPI journal article supplement (doi:10.3390/ijms241914866), 2023-10-03
Supplement: s1 [file s1]

| Variant and risk allele            | P-value | P-value annotation | RAF   | OR | Beta           | CI             |
|------------------------------------|---------|--------------------|-------|----|----------------|----------------|
| rs12785878-T 2 x 10 <sup>-27</sup> | -       |                    | 0.23  | -  | -              | -              |
| rs2282679-T 2 x 10 <sup>-109</sup> | -       |                    | 0.29  | -  | -              | -              |
| rs10741657-T 3 x 10 <sup>-20</sup> | -       |                    | 0.40  | -  | -              | -              |
| rs7129781-C 4 x 10 <sup>-33</sup>  | -       |                    | 0.071 | -  | 0.189 unit inc | [0.16-0.22]    |
| rs4944958-A 9 x 10 <sup>-143</sup> | -       |                    | 0.203 | -  | 0.259 unit inc | [0.24-0.28]    |
| rs964184-G 3 x 10 <sup>-14</sup>   | -       |                    | 0.129 | -  | 0.095 unit inc | [0.071-0.119]  |
| rs10859995-T 3 x 10 <sup>-33</sup> | -       |                    | 0.42  | -  | 0.105 unit de  | [0.087-0.123]  |
| rs1532085-A 1 x 10 <sup>-8</sup>   | -       |                    | 0.383 | -  | 0.05 unit incr | [0.032-0.068]  |
| rs1800588-T 2 x 10 <sup>-10</sup>  | -       |                    | 0.212 | -  | 0.066 unit inc | [0.046-0.086]  |
| rs55791371-C 1 x 10 <sup>-9</sup>  | -       |                    | 0.121 | -  | 0.081 unit de  | [0.056-0.106]  |
| rs10426201-C 8 x 10 <sup>-20</sup> | -       |                    | 0.169 | -  | 0.106 unit de  | [0.082-0.13]   |
| rs3750297-A 3 x 10 <sup>-10</sup>  | -       |                    | 0.283 | -  | 0.059 unit inc | [0.041-0.077]  |
| rs12123821-T 6 x 10 <sup>-26</sup> | -       |                    | 0.047 | -  | 0.227 unit de  | [0.18-0.27]    |
| rs4845491-C 7 x 10 <sup>-10</sup>  | -       |                    | 0.054 | -  | 0.119 unit de  | [0.082-0.156]  |
| rs8123293-G 3 x 10 <sup>-8</sup>   | -       |                    | 0.113 | -  | 0.076 unit de  | [0.049-0.103]  |
| rs17217119-C 5 x 10 <sup>-16</sup> | -       |                    | 0.193 | -  | 0.086 unit inc | [0.064-0.108]  |
| rs3755322-G 6 x 10 <sup>-12</sup>  | -       |                    | 0.083 | -  | 0.104 unit inc | [0.075-0.133]  |
| rs6600893-C 5 x 10 <sup>-15</sup>  | -       |                    | 0.452 | -  | 0.067 unit inc | [0.049-0.085]  |
| rs2282679-G 1 x 10 <sup>-200</sup> | -       |                    | 0.274 | -  | 0.429 unit inc | [0.41-0.45]    |
| rs2205262-C 5 x 10 <sup>-11</sup>  | -       |                    | 0.429 | -  | 0.057 unit de  | [0.039-0.075]  |
| rs11723621-T 2 x 10 <sup>-24</sup> | -       |                    | NR    | -  | 1.28 ng/mL ir  | [-18.7708-21.  |
| rs11023332-T 3 x 10 <sup>-11</sup> | -       |                    | NR    | -  | 0.77 ng/mL ir  | [-12.2444-13.  |
| rs7041-T 2 x 10 <sup>-9</sup>      | -       |                    | NR    | -  | 0.79 ng/mL ir  | [-11.0288-12.  |
| rs12803256-T 4 x 10 <sup>-8</sup>  | -       |                    | NR    | -  | 0.65 ng/mL ir  | [-10.13-11.43] |
| rs3831470-T 1 x 10 <sup>-6</sup>   | -       |                    | NR    | -  | 0.58 ng/mL ir  | [-9.024-10.18] |
| rs78359207-T 2 x 10 <sup>-6</sup>  | -       |                    | NR    | -  | 0.59 ng/mL ir  | [-8.7788-9.95] |
| rs55715230-T 3 x 10 <sup>-6</sup>  | -       |                    | NR    | -  | 0.66 ng/mL ir  | [-8.5324-9.85] |
| rs306141-T 3 x 10 <sup>-6</sup>    | -       |                    | NR    | -  | 0.6 ng/mL inc  | [-8.5336-9.73] |
| rs17382663-T 5 x 10 <sup>-6</sup>  | -       |                    | NR    | -  | 0.91 ng/mL d   | [-8.008-9.828] |
| rs58788626-T 7 x 10 <sup>-6</sup>  | -       |                    | NR    | -  | 0.84 ng/mL d   | [-7.98-9.66]   |

| Mapped gene   | Reported trait | Trait(s)        | Background trait(s) | Study accession | Location     |
|---------------|----------------|-----------------|---------------------|-----------------|--------------|
| NADSYN1       | Vitamin D ins  | vitamin D def - |                     | GCST000697      | 11:71456403  |
| GC            | Vitamin D ins  | vitamin D def - |                     | GCST000697      | 4:71742666   |
| CYP2R1, CALC  | Vitamin D ins  | vitamin D def - |                     | GCST000697      | 11:14893332  |
| CYP2R1        | Vitamin D ins  | vitamin D def - |                     | GCST9002024     | 11:14890871  |
| NADSYN1       | Vitamin D ins  | vitamin D def - |                     | GCST9002024     | 11:71457027  |
| ZPR1          | Vitamin D ins  | vitamin D def - |                     | GCST9002024     | 11:116778201 |
| HAL           | Vitamin D ins  | vitamin D def - |                     | GCST9002024     | 12:95981904  |
| ALDH1A2       | Vitamin D ins  | vitamin D def - |                     | GCST9002024     | 15:58391167  |
| LIPC, ALDH1A  | Vitamin D ins  | vitamin D def - |                     | GCST9002024     | 15:58431476  |
| SMARCA4       | Vitamin D ins  | vitamin D def - |                     | GCST9002024     | 19:11077477  |
| SULT2A1       | Vitamin D ins  | vitamin D def - |                     | GCST9002024     | 19:47881492  |
| PADI1         | Vitamin D ins  | vitamin D def - |                     | GCST9002024     | 1:17233181   |
| FLG-AS1       | Vitamin D ins  | vitamin D def - |                     | GCST9002024     | 1:152206676  |
| LCE6A, SMCP   | Vitamin D ins  | vitamin D def - |                     | GCST9002024     | 1:152877093  |
| CYP24A1, BC   | Vitamin D ins  | vitamin D def - |                     | GCST9002024     | 20:54102016  |
| BCAS1, CYP24  | Vitamin D ins  | vitamin D def - |                     | GCST9002024     | 20:54126051  |
| UGT1A6, UGT1  | Vitamin D ins  | vitamin D def - |                     | GCST9002024     | 2:233713141  |
| UGT2B7, UGT   | Vitamin D ins  | vitamin D def - |                     | GCST9002024     | 4:69113183   |
| GC            | Vitamin D ins  | vitamin D def - |                     | GCST9002024     | 4:71742666   |
| LINC00536     | Vitamin D ins  | vitamin D def - |                     | GCST9002024     | 8:115999659  |
| GC            | Vitamin D ins  | vitamin D def - |                     | GCST9010173     | 4:71749645   |
| PDE3B         | Vitamin D ins  | vitamin D def - |                     | GCST9010173     | 11:14762564  |
| GC            | Vitamin D ins  | vitamin D def - |                     | GCST9010173     | 4:71752617   |
| ACTE1P        | Vitamin D ins  | vitamin D def - |                     | GCST9010173     | 11:71421822  |
| NADSYN1       | Vitamin D ins  | vitamin D def - |                     | GCST9010173     | 11:71454899  |
| NPFFR2        | Vitamin D ins  | vitamin D def - |                     | GCST9010173     | 4:72032699   |
| PACRG         | Vitamin D ins  | vitamin D def - |                     | GCST9010173     | 6:162756538  |
| LINC01824, LI | Vitamin D ins  | vitamin D def - |                     | GCST9010173     | 2:6458749    |
| PVT1          | Vitamin D ins  | vitamin D def - |                     | GCST9010173     | 8:128090786  |
| MAP3K9-DT,    | Vitamin D ins  | vitamin D def - |                     | GCST9010173     | 14:70865550  |

rs2228570

id

|     | rs10741657 | rs12785878 | rs2282679 | rs4988235 |
|-----|------------|------------|-----------|-----------|
| 1   | GG         | TT         | AA        | CC        |
| 100 | AG         | TT         | AA        | CC        |
| 101 | AG         | GT         | AA        | TC        |
| 103 | GG         | TT         | AA        | CC        |
| 104 | GG         | TT         | AA        | TC        |
| 106 | GG         | GT         | AA        | CC        |
| 107 | AA         | GG         | AA        | CC        |
| 109 | GG         | TT         | CA        | CC        |
| 11  | AG         | TT         | AA        | TC        |
| 111 | AG         | TT         | CC        | CC        |
| 112 | GG         | GT         | AA        | TC        |
| 114 | GG         | TT         | AA        | CC        |
| 115 | AG         | GT         | CA        | TC        |
| 116 | GG         | GT         | CA        | TC        |
| 117 | GG         | GG         | CA        | CC        |
| 118 | AG         | GT         | AA        | CC        |
| 119 | GG         | TT         | AA        | TC        |
| 121 | AA         | GT         | CA        | CC        |
| 122 | GG         | GT         | CA        | CC        |
| 123 | AG         | TT         | AA        | TC        |
| 124 | GG         | TT         | AA        | TC        |
| 125 | GG         | GG         | AA        | CC        |
| 127 | AG         | TT         | CA        | CC        |
| 128 | GG         | GG         | AA        | TC        |
| 129 | AG         | GT         | CA        | CC        |
| 13  | GG         | GT         | AA        | CC        |
| 130 | AG         | GG         | AA        | TC        |
| 131 | AG         | TT         | AA        | TC        |
| 133 | GG         | TT         | CA        | CC        |
| 134 | AG         | TT         | AA        | TC        |
| 135 | AG         | GT         | AA        | CC        |
| 136 | GG         | GT         | CA        | TC        |
| 137 | AG         | TT         | AA        | CC        |
| 138 | AA         | GG         | AA        | TC        |
| 139 | GG         | TT         | AA        | TT        |
| 14  | AG         | GG         | AA        | TC        |
| 140 | AA         | GT         | AA        | TC        |
| 141 | AG         | GT         | CA        | CC        |
| 142 | AG         | GT         | CA        | CC        |
| 143 | GG         | GT         | CA        | CC        |
| 144 | AG         | TT         | AA        | TC        |
| 145 | AA         | TT         | AA        | CC        |

1

2

3

3

|     |    |    |    |    |   |
|-----|----|----|----|----|---|
| 146 | AG | TT | AA | CC |   |
| 147 | GG | TT | CA | TC |   |
| 148 | AG | TT | CA | TC |   |
| 149 | AG | GT | AA | CC |   |
| 150 | GG | TT | CC | TC |   |
| 151 | AG | TT | AA | CC |   |
| 152 | AG | TT | AA | CC |   |
| 153 | AA | GT | AA | CC |   |
| 154 | GG | GT | CA | CC |   |
| 156 | GG | TT | CA | TC |   |
| 158 | GG | GT | CA | TC |   |
| 159 | AG | GT | AA | TC |   |
| 16  | AG | GT | CA | CC |   |
| 160 | AG | GT | AA | CC |   |
| 161 | GG | GT | CA | CC |   |
| 162 | AG | GG | CA | CC | 4 |
| 163 | GG | GT | AA | TC |   |
| 164 | GG | GT | CC | CC |   |
| 165 | AG | GG | AA | CC | 5 |
| 166 | AG | GG | CA | CC | 6 |
| 167 | GG | GG | AA | TC | 4 |
| 169 | GG | TT | AA | CC |   |
| 17  | GG | GG | AA | CC | 7 |
| 170 | AA | GT | AA | CC |   |
| 171 | AG | GT | CA | TC |   |
| 172 | AA | GT | CA | CC |   |
| 173 | GG | TT | CA | CC |   |
| 174 | AG | GT | AA | CC |   |
| 175 | AA | GT | AA | CC |   |
| 177 | GG | TT | CC | CC |   |
| 179 | AG | GT | AA | TC |   |
| 18  | AG | TT | CC | TC |   |
| 180 | AG | TT | AA | TC |   |
| 181 | GG | GT | CA | TC |   |
| 183 | AG | GT | CA | TC |   |
| 184 | GG | TT | AA | CC |   |
| 185 | AA | GT | CA | CC |   |
| 186 | AG | GG | AA | TC |   |
| 187 | AG | TT | AA | CC |   |
| 188 | AG | GT | AA | CC |   |
| 189 | GG | GT | AA | CC |   |
| 19  | GG | GG | AA | CC | 8 |
| 190 | AG | TT | CA | TC |   |

|     |    |    |    |    |    |
|-----|----|----|----|----|----|
| 191 | AA | GT | CA | CC |    |
| 192 | AA | GG | AA | TC |    |
| 193 | GG | GT | CA | TC |    |
| 194 | AG | TT | AA | TC |    |
| 195 | AG | GT | CA | CC |    |
| 196 | GG | TT | CA | CC |    |
| 197 | AG | GT | AA | TC |    |
| 198 | AA | GT | CA | CC |    |
| 199 | AG | GG | AA | TC |    |
| 2   | AG | TT | AA | TT |    |
| 20  | AG | GG | AA | CC | 9  |
| 200 | AA | TT | AA | CC |    |
| 201 | AG | TT | CA | CC |    |
| 202 | GG | GT | CA | CC |    |
| 203 | GG | TT | AA | TC |    |
| 204 | GG | GG | AA | TC | 7  |
| 205 | AA | GT | CC | CC |    |
| 206 | AG | GT | CA | TC |    |
| 207 | GG | GG | AA | CC | 10 |
| 208 | GG | TT | AA | TC |    |
| 209 | GG | TT | AA | CC |    |
| 21  | GG | GG | AA | CC | 11 |
| 210 | GG | GT | AA | TC |    |
| 211 | AG | GG | AA | TT |    |
| 212 | GG | GG | AA | TC | 10 |
| 213 | AG | TT | AA | TC |    |
| 215 | AG | GT | CA | CC |    |
| 22  | GG | GT | AA | CC |    |
| 23  | AG | GT | AA | CC |    |
| 24  | AG | GT | AA | CC |    |
| 25  | GG | GT | AA | TC |    |
| 26  | GG | GG | AA | TC | 11 |
| 27  | GG | GT | CA | CC |    |
| 28  | AA | GT | AA | TC |    |
| 29  | AG | GT | AA | TC |    |
| 30  | GG | GG | AA | CC | 12 |
| 31  | GG | GT | CA | CC |    |
| 32  | AA | TT | AA | CC |    |
| 33  | AA | TT | AA | CC |    |
| 34  | AG | GG | CA | CC | 13 |
| 35  | GG | TT | CA | TT |    |
| 36  | GG | GG | AA | CC | 14 |
| 37  | AG | TT | CC | CC |    |

|    |    |    |    |    |    |
|----|----|----|----|----|----|
| 38 | AG | GT | CA | TC |    |
| 39 | AG | TT | CA | CC |    |
| 4  | AA | GT | CA | CC |    |
| 40 | GG | GT | AA | CC |    |
| 41 | AG | GG | CA | CC | 15 |
| 42 | AA | TT | AA | CC |    |
| 43 | AG | GT | AA | TC |    |
| 44 | AG | GT | AA | CC |    |
| 45 | AG | GT | AA | TC |    |
| 46 | GG | TT | AA | TC |    |
| 47 | AG | TT | CA | TC |    |
| 48 | GG | GT | CA | CC |    |
| 49 | AG | GG | AA | CC | 16 |
| 5  | AG | TT | AA | CC |    |
| 50 | AG | GG | CA | CC | 17 |
| 51 | AG | GT | CA | TC |    |
| 52 | AG | GT | CA | CC |    |
| 53 | AG | TT | CC | TC |    |
| 54 | AG | GT | AA | TC |    |
| 55 | AG | TT | CA | CC |    |
| 56 | GG | GT | AA | CC |    |
| 57 | AG | GG | AA | CC | 18 |
| 58 | GG | GT | AA | CC |    |
| 59 | GG | TT | CC | CC |    |
| 6  | AG | TT | AA | CC |    |
| 60 | GG | TT | AA | TC |    |
| 61 | AG | GG | CA | CC | 19 |
| 62 | GG | GT | CA | CC |    |
| 63 | GG | TT | CA | TC |    |
| 64 | AG | TT | CA | CC |    |
| 65 | GG | GT | AA | CC |    |
| 66 | AG | GT | AA | TC |    |
| 67 | GG | TT | CA | TC |    |
| 68 | GG | TT | AA | CC |    |
| 69 | AG | GT | AA | CC |    |
| 7  | GG | GT | AA | CC |    |
| 70 | GG | GG | AA | TT | 14 |
| 71 | GG | GT | CA | CC |    |
| 74 | AG | GG | AA | CC | 20 |
| 75 | AG | GT | AA | CC |    |
| 76 | GG | GG | AA | CC | 21 |
| 78 | GG | GT | AA | TC |    |
| 79 | GG | GT | AA | CC |    |

|    |    |    |    |    |    |
|----|----|----|----|----|----|
| 8  | AG | TT | CA | CC | 22 |
| 80 | GG | TT | AA | CC |    |
| 81 | AG | GG | CA | CC |    |
| 82 | GG | GT | CA | CC |    |
| 83 | GG | GT | AA | TC |    |
| 85 | AG | GT | AA | CC |    |
| 86 | GG | GT | AA | TC |    |
| 87 | AG | GG | AA | TC |    |
| 88 | GG | GT | AA | TC |    |
| 89 | AG | GT | AA | TC |    |
| 9  | GG | TT | AA | TC |    |
| 90 | GG | GT | AA | CC |    |
| 91 | GG | TT | CA | CC |    |
| 92 | GG | GT | AA | CC |    |
| 93 | GG | GT | AA | CC |    |
| 94 | AG | TT | AA | CC |    |
| 95 | GG | GT | CA | CC |    |
| 96 | GG | GT | CC | TC |    |
| 97 | GG | TT | CA | CC |    |
| 98 | AG | GG | AA | CC | 23 |
| 99 | AG | GT | CA | CC |    |



rs10741657-GG and rs4988235-GG

| patient | rs11568820 | rs1544410 | rs7975232 | seq.rs2228570 |
|---------|------------|-----------|-----------|---------------|
| 1       | GG         | GG        | AC        | AA            |
| 100     | GG         | GG        | CC        | AA            |
| 101     | AG         | AG        | AC        | AA            |
| 103     | GG         | AA        | AA        | AA            |
| 104     | AG         | AG        | AC        | AA            |
| 106     | GG         | GG        | CC        | AA            |
| 107     | GG         | AG        | AA        | AA            |
| 109     | GG         | AG        | AC        | AA            |
| 11      | GG         | GG        | AA        | AA            |
| 111     | GG         | GG        | CC        | AA            |
| 112     | GG         | GG        | CC        | AA            |
| 114     | GG         | GG        | CC        | AA            |
| 115     | GG         | AG        | AA        | AA            |
| 116     | GG         | AG        | AC        | AA            |
| 117     | GG         | AG        | AC        | AA            |
| 118     | GG         | AG        | AC        | AA            |
| 119     | GG         | GG        | CC        | AA            |
| 121     | GG         | GG        | CC        | AA            |
| 122     | GG         | AG        | AC        | AA            |
| 123     | GG         | AG        | AA        | AA            |
| 124     | GG         | GG        | CC        | AA            |
| 125     | GG         | GG        | AA        | AA            |
| 127     | GG         | AG        | AC        | AA            |
| 128     | GG         | GG        | AA        | AA            |
| 129     | AG         | GG        | AC        | AA            |
| 13      | GG         | GG        | CC        | AA            |
| 130     | GG         | AG        | AA        | AA            |
| 131     | GG         | GG        | CC        | AA            |
| 133     | GG         | GG        | CC        | AA            |
| 134     | GG         | AG        | AC        | AA            |
| 135     | AG         | AA        | AA        | AA            |
| 136     | GG         | GG        | AC        | AA            |
| 137     | GG         | AG        | AC        | AA            |
| 138     | AG         | GG        | CC        | AA            |
| 139     | GG         | GG        | CC        | AA            |
| 14      | GG         | AG        | AC        | AA            |
| 140     | GG         | GG        | CC        | AA            |
| 141     | AG         | GG        | CC        | AA            |
| 142     | GG         | GG        | AC        | AA            |
| 143     | GG         | GG        | CC        | AA            |
| 144     | GG         | GG        | CC        | AA            |
| 145     | GG         | GG        | AC        | AA            |

|        |    |    |    |
|--------|----|----|----|
| 146 GG | AG | AC | AA |
| 147 GG | AG | AC | AA |
| 148 AG | AG | AA | AA |
| 149 GG | GG | CC | AA |
| 150 AG | AG | AA | AA |
| 151 GG | AA | AA | AA |
| 152 GG | AG | AC | AA |
| 153 GG | AG | AC | AA |
| 154 GG | AG | AA | AA |
| 156 GG | GG | CC | AA |
| 158 AA | GG | AC | AA |
| 159 GG | AG | AC | AA |
| 16 GG  | GG | CC | AA |
| 160 AG | AG | AA | AA |
| 161 GG | AG | AA | AA |
| 162 AG | AG | AA | AA |
| 163 GG | GG | CC | AA |
| 164 AG | AG | AC | AA |
| 165 GG | GG | CC | AA |
| 166 GG | AG | AA | AA |
| 167 AG | AA | AA | AA |
| 169 GG | GG | AC | AA |
| 17 AG  | GG | CC | AA |
| 170 GG | AG | AC | AA |
| 171 GG | AG | AC | AA |
| 172 GG | GG | CC | AA |
| 173 GG | GG | CC | AA |
| 174 GG | GG | AC | AA |
| 175 GG | GG | CC | AA |
| 177 GG | AG | AA | AA |
| 179 GG | AG | AC | AA |
| 18 GG  | GG | CC | AA |
| 180 AG | GG | AC | AA |
| 181 AG | GG | AC | AA |
| 183 AA | AG | AC | AA |
| 184 GG | AG | AC | AA |
| 185 GG | GG | AC | AA |
| 186 AG | AA | AA | AA |
| 187 GG | GG | AC | AA |
| 188 AG | GG | AA | AA |
| 189 GG | GG | AA | AA |
| 19 GG  | GG | AC | AA |
| 190 AG | GG | CC | AA |

|        |    |    |    |
|--------|----|----|----|
| 191 AG | AG | AC | AA |
| 192 GG | GG | CC | AA |
| 193 GG | GG | CC | AA |
| 194 GG | AG | AA | AA |
| 195 GG | AG | AC | AA |
| 196 GG | AG | AA | AA |
| 197 AG | GG | CC | AA |
| 198 AG | GG | CC | AA |
| 199 AG | GG | CC | AA |
| 2 AG   | AG | AA | AA |
| 20 GG  | AG | AC | AA |
| 200 GG | GG | CC | AA |
| 201 GG | GG | AC | AA |
| 202 GG | GG | AC | AA |
| 203 AG | AG | AA | AA |
| 204 GG | GG | AC | AA |
| 205 GG | GG | CC | AA |
| 206 GG | AG | AC | AA |
| 207 GG | AG | AC | AA |
| 208 GG | GG | CC | AA |
| 209 GG | GG | AC | AA |
| 21 GG  | GG | CC | AA |
| 210 GG | AG | AC | AA |
| 211 GG | GG | CC | AA |
| 212 AG | GG | CC | AA |
| 213 GG | AG | AC | AA |
| 215 AA | AG | AC | AA |
| 22 AG  | AA | AA | AA |
| 23 GG  | GG | AA | AA |
| 24 GG  | AG | AC | AA |
| 25 GG  | AG | AC | AA |
| 26 GG  | GG | CC | AA |
| 27 GG  | GG | AC | AA |
| 28 GG  | AG | AC | AA |
| 29 GG  | GG | CC | AA |
| 30 AG  | GG | AC | AA |
| 31 GG  | AG | AC | AA |
| 32 AA  | AA | AA | AA |
| 33 AA  | AA | AA | AA |
| 34 GG  | GG | CC | AA |
| 35 GG  | GG | AC | AA |
| 36 GG  | GG | CC | AA |
| 37 GG  | AG | AC | AA |

|       |    |    |    |
|-------|----|----|----|
| 38 GG | GG | AC | AA |
| 39 GG | GG | CC | AA |
| 4 AG  | GG | CC | AA |
| 40 GG | GG | AC | AA |
| 41 GG | GG | AC | AA |
| 42 GG | AG | AC | AA |
| 43 GG | AG | AC | AA |
| 44 GG | GG | AA | AA |
| 45 GG | GG | CC | AA |
| 46 GG | GG | AA | AA |
| 47 GG | AG | AA | AA |
| 48 AG | GG | AA | AA |
| 49 GG | GG | AC | AA |
| 5 GG  | GG | AC | AA |
| 50 GG | GG | CC | AA |
| 51 GG | GG | CC | AA |
| 52 GG | AA | AA | AA |
| 53 GG | GG | AC | AA |
| 54 GG | GG | AC | AA |
| 55 AG | GG | AC | AA |
| 56 GG | GG | CC | AA |
| 57 GG | AG | AA | AA |
| 58 GG | AG | AC | AA |
| 59 AG | AG | AA | AA |
| 6 AG  | AG | AC | AA |
| 60 GG | AG | AC | AA |
| 61 GG | AG | AA | AA |
| 62 GG | AG | AA | AA |
| 63 GG | GG | AA | AA |
| 64 GG | AG | AC | AA |
| 65 GG | GG | CC | AA |
| 66 GG | GG | AC | AA |
| 67 AG | AG | AC | AA |
| 68 GG | GG | AC | AA |
| 69 GG | AG | AA | AA |
| 7 GG  | GG | CC | AA |
| 70 GG | GG | AC | AA |
| 71 GG | AG | AC | AA |
| 74 AG | AG | AC | AA |
| 75 GG | GG | AC | AA |
| 76 GG | GG | AC | AA |
| 78 AG | AG | AC | AA |
| 79 AG | AG | AC | AA |

|       |    |    |    |
|-------|----|----|----|
| 8 GG  | GG | AC | AA |
| 80 GG | GG | CC | AA |
| 81 GG | GG | CC | AA |
| 82 GG | GG | CC | AA |
| 83 GG | GG | CC | AA |
| 85 GG | GG | AC | AA |
| 86 GG | GG | AA | AA |
| 87 GG | GG | CC | AA |
| 88 GG | GG | AA | AA |
| 89 GG | GG | AC | AA |
| 9 AG  | AG | AC | AA |
| 90 GG | AG | AC | AA |
| 91 GG | AG | AC | AA |
| 92 GG | GG | AC | AA |
| 93 AG | AG | AC | AA |
| 94 GG | GG | CC | AA |
| 95 GG | AG | AA | AA |
| 96 AG | GG | AC | AA |
| 97 GG | GG | CC | AA |
| 98 GG | GG | AA | AA |
| 99 GG | AA | AA | AA |

z

|   |              |           |         |                |           |           |
|---|--------------|-----------|---------|----------------|-----------|-----------|
| 2 | rs4988235    | 136608646 | ALL(NP) | T              | C         | TT/TC/CC  |
|   | Risk Variant | Chr       | Gene    | Phenotype      | Genotype  | 5/70/117  |
|   | rs4988235    | 2         |         |                | TT        | TC        |
|   |              |           |         | Lactose Mala   | 5(2.6%)   | 70(36.4%) |
|   | rs228679     | 4         |         |                | CC        | CA        |
|   |              |           |         | Deficiency Vit | 10(5.2%)  | 65(33.8%) |
|   | rs12785878   | 11        |         |                | GG        | GT        |
|   |              |           |         | Deficiency Vit | 37(19.3%) | 88(45.8%) |
|   | rs10741657   | 11        |         |                | AA        | AG        |
|   |              |           |         | Deficiency Vit | 20(10.4%) | 86(44.8%) |

### European lactase genotype determines lactase phenotype

**Table 3** General characteristics, self-reported gastrointestinal symptoms, C>T<sub>-13910</sub> single nucleotide polymorphism genotype and allele frequency in 216 individuals

| Hispanics n = 216                     |             |
|---------------------------------------|-------------|
| Women (%)                             | 46          |
| Age (years)                           | 50 ± 12     |
| N° self-reporting lactose intolerance | 44 (20.4%)  |
| N° reporting diarrhoea                | 15 (7%)     |
| N° reporting bloating                 | 77 (35.6%)  |
| LCT-13910 CC genotype                 | 123 (56.9%) |
| LCT-13910 CT genotype                 | 90 (41.7%)  |
| LCT-13910 TT genotype                 | 3 (1.4%)    |
| C allele frequency                    | 77.7%       |
| T allele frequency                    | 22.3%       |

|              |             |                  |             |
|--------------|-------------|------------------|-------------|
|              | 192         | 216              |             |
| Risk Variant | IBD Chilean | Hispanic Chilean | Amerindian* |
| rs4988235    | C=0.79      | C=0.77           | C=0.94      |
|              | T=0.21      | T=0.22           | T=0.6       |





0.3646      0.3299      0.1903

Allele Frequency

CC      C=0.79

117(61%)      T=0.21

AA      C=0.22

117(61%)      A=0.88

TT      G=0.42

67(34.9%)      T=0.58

GG      G=0.67

86(44.8%)      A=0.33

**G|G: 0.631**

**A|A: 0.063**

**A|G: 0.305**

Risk Variant    Chr

rs4988235

2

rs228679

4

rs12785878

11

rs10741657

11

## Genotype in Chilean population

Symptoms related to dairy ingestion and lactase (LCT) frequencies in a population of Hispanic and Amerindian

|  | Amerindians n=43 | p Value |
|--|------------------|---------|
|  | 65               | 0.02    |
|  | 54±15            | NS      |
|  | 19 (44.1%)       | 0.001   |
|  | 16 (37.2%)       | <0.001  |
|  | 14 (32.5%)       | NS      |
|  | 38 (88.3%)       | <0.001  |
|  | 5 (11.7%)        | <0.001  |
|  | 0                | NS      |
|  | 94.2%            | <0.001  |
|  | 5.8%             | <0.001  |

11 rs12785878

4 rs2282679

11 rs10741657

AMR\*

EUR\*

EAS\*

AFR\*

C=0.78

C=0.49

C=1

C=0.97

A=0.22

T=0.51

T=0

A=0.3

C

T

IBD Chilean    0.79

0.21

Hispanic Chilean    0.77

0.22

Amerindian C    0.94

0.6

AMR

0.78

0.22

|     |      |      |   |
|-----|------|------|---|
| EUR | 0.49 | 0.51 |   |
| EAS |      | 1    | 0 |
| AFR | 0.97 | 0.03 |   |

(219)  
(22)  
(106)

| Aym        | Map        | Eur        | Afr       |
|------------|------------|------------|-----------|
| 0,10781973 | 0,29773621 | 0,57101775 | 0,0234263 |
| 0,00001    | 0,00001    | 0,021482   | 0,00001   |
| 0,263526   | 0,854842   | 0,991303   | 0,200194  |

| Gene | Allele | Freque         | Phenotype | Genotype  |           |           |
|------|--------|----------------|-----------|-----------|-----------|-----------|
|      | C=0.79 |                |           | TT        | TC        | CC        |
|      | T=0.21 | Lactose Mala   |           | 5(2.6%)   | 70(36.4%) | 117(61%)  |
|      | C=0.22 |                |           | CC        | CA        | AA        |
|      | A=0.88 | Deficiency Vit |           | 10(5.2%)  | 65(33.8%) | 117(61%)  |
|      | G=0.42 |                |           | GG        | GT        | TT        |
|      | T=0.58 | Deficiency Vit |           | 37(19.3%) | 88(45.8%) | 67(34.9%) |
|      | G=0.67 |                |           | AA        | AG        | GG        |
|      | A=0.33 | Deficiency Vit |           | 20(10.4%) | 86(44.8%) | 86(44.8%) |

|          |         |   |   |           |
|----------|---------|---|---|-----------|
| 71167449 | ALL(NP) | G | T | 37/88/67  |
| 72608383 | ALL(NP) | C | A | 10/65/117 |
| 14914878 | ALL(NP) | A | G | 20/86/86  |

| Risk Variant | Allele Freque    | Genotype<br>Chile-IBD |                 |                 |                                                         |
|--------------|------------------|-----------------------|-----------------|-----------------|---------------------------------------------------------|
| rs4988235    | C=0.79<br>T=0.21 | TT<br>5(2.6%)         | TC<br>70(36.4%) | CC<br>117(61%)  | All<br>C: 0.839 (4200)<br>T: 0.161 (808)                |
| rs2282679    | C=0.22<br>A=0.88 | CC<br>10(5.2%)        | CA<br>65(33.8%) | AA<br>117(61%)  | ALL<br>A: 0.798 (3996)<br>C: 0.202 (1012)               |
| rs12785878   | G=0.42<br>T=0.58 | GG<br>37(19.3%)       | GT<br>88(45.8%) | TT<br>67(34.9%) | All<br>G: 0.646 (3235)<br>T: 0.354 (1773)               |
| rs10741657   | G=0.67<br>A=0.33 | AA<br>20(10.4%)       | AG<br>86(44.8%) | GG<br>86(44.8%) | All<br><b>A: 0.308 (1541)</b><br><b>G: 0.692 (3467)</b> |
| VDDR and iBD |                  |                       |                 |                 | All                                                     |
| rs2228570    | A=1<br>G=0       | AA<br>192             | AG<br>0         | GG<br>0         | <b>A: 0.328 (1645)</b><br><b>G: 0.672 (3363)</b>        |

TT  
197(0.979%)

TC  
414(0.165%)

CC  
1893(0.756%)

European  
C: 0.492 (495)  
T: 0.508 (511)

CC: 0.047 (118)      **CA: 0.310 (776)** **AA: 0.643 (1610)**  
118                      776                      1610

European  
A: 0.753 (758)  
C: 0.247 (248)

G|G: 0.465 (1164)      G|T: 0.362 (907)      **T|T: 0.173 (433)**  
1164                      907                      433

European  
G: 0.299 (301)  
T: 0.701 (705)

**A|A: 0.097 (244)**      **A|G: 0.421 (1053)** **G|G: 0.482 (1207)**  
244                      1053                      1207

European  
A: 0.381 (383)  
G: 0.619 (623)

**A|A: 0.125 (312)**      **A|G: 0.408 (1021)** **G|G: 0.468 (1171)**  
312                      1021                      1171

TT  
162(0.322%)

TC  
187(0.372)

CC  
154(0.306)

American  
G: 0.784 (544) TT  
A: 0.216 (150) 22(0.063)

CC: 0.054 (27) CA: 0.386 (194) AA: 0.561 (282)  
27 194 282

American  
T: 0.791 (549) CC: 0.032 (11  
G: 0.209 (145) 11

G|G: 0.097 (49) G|T: 0.404 (203) **T|T: 0.499 (251)**  
49 203 251

American  
G: 0.550 (382) G|G: 0.320 (1  
T: 0.450 (312) 111

A|A: 0.153 (77) A|G: 0.455 (229) **G|G: 0.392 (197)**  
77 229 197

American  
A: 0.284 (197) A|A: 0.075 (2  
G: 0.716 (497) 26

|             |            |                  |    |    |     |
|-------------|------------|------------------|----|----|-----|
| TC          | GG         | Asian            |    |    |     |
| 106(0.305 ) | 219(0.631) | G: 1.000 (100 TT | TC | CC | 504 |

|                               |       |                             |                     |               |     |
|-------------------------------|-------|-----------------------------|---------------------|---------------|-----|
| CA: 0.354 (12 AA: 0.614 (213) | Asian |                             |                     |               |     |
| 123                           | 213   | T: 0.739 (745 G G: 0.067 (3 | <b>G T: 0.387 (</b> | T T: 0.546 (2 |     |
|                               |       | G: 0.261 (263               | 34                  | 195           | 275 |

|               |                        |                     |              |                     |                     |
|---------------|------------------------|---------------------|--------------|---------------------|---------------------|
| G T: 0.461 (1 | <b>T T: 0.219 (76)</b> | Asian               |              |                     |                     |
| 160           | 76                     | <b>G: 0.620 (62</b> | G G: 0.377 ( | <b>G T: 0.486 (</b> | <b>T T: 0.137 (</b> |
|               |                        | <b>T: 0.380 (38</b> | 190          | 245                 | 69                  |

|               |                         |                                           |                   |     |     |
|---------------|-------------------------|-------------------------------------------|-------------------|-----|-----|
| A G: 0.418 (1 | <b>G G: 0.507 (176)</b> | A: 0.319 (322 A A: 0.097 (4 A G: 0.444 (2 | <b>G G: 0.458</b> |     |     |
| 145           | 176                     | G: 0.681 (686                             | 49                | 224 | 231 |

75)

**(69)**

**(231)**



|                   | TT | TC | CC | P Value (Chi square) |
|-------------------|----|----|----|----------------------|
| Chilean-IBD       |    | 5  | 70 | 117 0.4              |
| Chilean-Hispanic* |    | 3  | 90 | 126 Reference        |
| Amerindians*      |    | 0  | 5  | 38 0.02              |

117/192 (60%) Chilean-IBD  
126/219(58%) Chilean-Hispanic\*  
38/43(88%) Amerindians\*

#### rs4988235 Genotypes

|             | TT | TC  | CC  | P Value Chi square |
|-------------|----|-----|-----|--------------------|
| Chilean-IBD |    | 5   | 70  | 117 Reference      |
| All         |    | 197 | 414 | 1893 7.74x10-12    |
| European    |    | 162 | 187 | 154 <2.2x10-16     |
| American    |    | 22  | 106 | 219 0.08           |
| East Asian  |    | 0   | 0   | 504 <2.2x10-16     |

#### rs2282679

|             | CC | CA  | AA  | P Value Chi square |
|-------------|----|-----|-----|--------------------|
| Chilean-IBD |    | 10  | 65  | 117 Reference      |
| All         |    | 118 | 776 | 1610 0.645         |
| European    |    | 27  | 194 | 282 0.494          |
| American    |    | 11  | 123 | 213 0.493          |
| East Asian  |    | 34  | 195 | 275 0.302          |

#### rs12785878

|             | GG | GT   | TT  | P Value Chisquare |
|-------------|----|------|-----|-------------------|
| Chilean-IBD |    | 37   | 88  | 67 Reference      |
| All         |    | 1164 | 907 | 433 1.32x10-14    |
| European    |    | 49   | 203 | 251 0.0001        |
| American    |    | 111  | 160 | 76 0.0005         |
| East Asian  |    | 190  | 245 | 69 7.24x10-11     |

#### rs10741657

|             | AA  | AG   | GG   |           |
|-------------|-----|------|------|-----------|
| Chilean-IBD | 20  | 86   | 86   | Reference |
| All         | 244 | 1053 | 1207 | 0.659     |
| European    | 77  | 229  | 197  | 0.175     |
| American    | 26  | 145  | 176  | 0.302     |
| East Asian  | 49  | 224  | 231  | 0.949     |

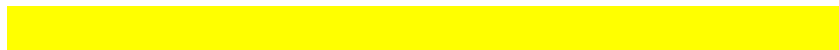

rs2228570

|             | AA  | AG   | GG   |                         |
|-------------|-----|------|------|-------------------------|
| Chilean-IBD | 192 | 0    | 0    | Reference               |
| All         | 312 | 1021 | 1171 | <2.2 x10 <sup>-16</sup> |
| European    | 80  | 220  | 203  | <2.2 x10 <sup>-16</sup> |
| American    | 83  | 169  | 95   | <2.2 x10 <sup>-16</sup> |
| East Asian  | 92  | 237  | 175  | <2.2 x10 <sup>-16</sup> |

rs1544410

|             | AA  | AG  | GG   |                         |
|-------------|-----|-----|------|-------------------------|
| Chilean-IBD | 10  | 73  | 109  | Reference               |
| All         | 281 | 920 | 1303 | 0.03                    |
| European    | 89  | 228 | 186  | 3.47x10 <sup>-7</sup>   |
| American    | 27  | 124 | 196  | 0.5                     |
| East Asian  | 0   | 55  | 439  | <2.2 x10 <sup>-16</sup> |

rs11568820

|             | GG  | AG  | AA  |                         |
|-------------|-----|-----|-----|-------------------------|
| Chilean-IBD | 148 | 39  | 5   | Reference               |
| All         | 941 | 838 | 725 | <2.2 x10 <sup>-16</sup> |
| European    | 303 | 171 | 29  | 0.0001                  |
| American    | 235 | 97  | 15  | 0.06                    |
| East Asian  | 189 | 231 | 84  | <2.2 x10 <sup>-16</sup> |

rs7975232

|             | CC  | AC  | AA   |                         |
|-------------|-----|-----|------|-------------------------|
| Chilean-IBD | 58  | 88  | 46   | Reference               |
| All         | 657 | 734 | 1113 | 3.32x10 <sup>-8</sup>   |
| European    | 115 | 170 | 21   | 2.84x10 <sup>-5</sup>   |
| American    | 116 | 75  | 156  | 3.54x10 <sup>-9</sup>   |
| East Asian  | 261 | 50  | 193  | <2.2 x10 <sup>-16</sup> |



GG  
37/192                    19%  
1164/2504                46%  
49/503                    9%  
111/347                   32%  
190/504                   38%

| rs12785878 | Chilean-IBD<br>(N=192) | All<br>(N=2504)       | OR        |
|------------|------------------------|-----------------------|-----------|
| TT         | 67(34.9)               | 433(17.3%)            | Reference |
| GT         | 88(45.8%)              | 907(36.2%)            | 1.59      |
| GG         | 37(19.3%)              | 1164(46.5%)           | 4.86      |
| rs12785878 | Chilean-IBD<br>(N=192) | European<br>(N=503)   | OR        |
| TT         | 67(34.9)               | 251(49.9%)            | Reference |
| GT         | 88(45.8%)              | 203(40.4%)            | 0.61      |
| GG         | 37(19.3%)              | 49 (9.7%)             | 0.35      |
| rs12785878 | Chilean-IBD<br>(N=192) | American<br>(N=347)   | OR        |
| TT         | 67(34.9)               | 76(21.9%)             | Reference |
| GT         | 88(45.8%)              | 160(46.1%)            | 1.60      |
| GG         | 37(19.3%)              | 111(32%)              | 2.64      |
| rs12785878 | Chilean-IBD<br>(N=192) | East Asian<br>(N=504) | OR        |
| TT         | 67(34.9)               | 69(13.7%)             | Reference |
| GT         | 88(45.8%)              | 245(48.6%)            | 2.70      |
|            |                        |                       |           |
| rs1544410  | Chilean-IBD<br>(N=192) | All<br>(N=2504)       | OR        |
| GG         | 109 (56.8%)            | 1303 (52%)            | Reference |
| AG         | 73(38%)                | 920(36.8%)            | 1.05      |
| AA         | 10(5.2%)               | 281(11.2%)            | 2.35      |
| rs1544410  | Chilean-IBD<br>(N=192) | European<br>(N=503)   | OR        |
| GG         | 109 (56.8%)            | 186(37%)              | Reference |
| AG         | 73(38%)                | 228(45.3%)            | 1.83      |
| AA         | 10(5.2%)               | 89(17.7%)             | 5.21      |
|            | Chilean-IBD            |                       |           |

| <b>rs1544410</b> | <b>(N=192)</b>     | <b>American</b>   | <b>OR</b> |
|------------------|--------------------|-------------------|-----------|
| <b>GG</b>        | 109 (56.8%)        | 196(56.2%)        | Reference |
| <b>AG</b>        | 73(38%)            | 124(35.7%)        | 0.94      |
| <b>AA</b>        | 10(5.2%)           | 27(7.8%)          | 1.50      |
| <b>rs1544410</b> | <b>Chilean-IBD</b> | <b>East Asian</b> | <b>OR</b> |
| <b>GG</b>        | 109 (56.8%)        | 439(87.1%)        |           |
| <b>AG</b>        | 73(38%)            | 65(12.9%)         | 0.22      |

| <b>rs11568820</b> | <b>Chilean-IBD</b> | <b>All</b>        | <b>OR</b> |
|-------------------|--------------------|-------------------|-----------|
|                   | <b>(N=192)</b>     | <b>(N=2504)</b>   |           |
| <b>GG</b>         | 148(77.1%)         | 941(37.6%)        | Reference |
| <b>GA</b>         | 39(20.3%)          | 838(33.5%)        | 3.37      |
| <b>AA</b>         | 5(2.6%)            | 725(29%)          | 22.80     |
| <b>rs11568820</b> | <b>Chilean-IBD</b> | <b>European</b>   | <b>OR</b> |
|                   | <b>(N=192)</b>     | <b>(N=503)</b>    |           |
| <b>GG</b>         | 148(77.1%)         | 303(60.2%)        | Reference |
| <b>GA</b>         | 39(20.3%)          | 171(34%)          | 2.14      |
| <b>AA</b>         | 5(2.6%)            | 29(5.8%)          | 2.83      |
| <b>rs11568820</b> | <b>Chilean-IBD</b> | <b>East Asian</b> | <b>OR</b> |
|                   | <b>(N=192)</b>     | <b>(N=504)</b>    |           |
| <b>GG</b>         | 148(77.1%)         | 189(37.5%)        | Reference |
| <b>GA</b>         | 39(20.3%)          | 231(45.8%)        | 4.63      |
| <b>AA</b>         | 5(2.6%)            | 84(16.7%)         | 13.15     |
| <b>rs11568820</b> | <b>Chilean-IBD</b> | <b>American</b>   | <b>OR</b> |
|                   | <b>(N=192)</b>     | <b>(N=347)</b>    |           |
| <b>GG</b>         | 148(77.1%)         | 235(67.7%)        | Reference |
| <b>GA</b>         | 39(20.3%)          | 97(28%)           | 1.56      |
| <b>AA</b>         | 5(2.6%)            | 15(4.3%)          | 1.88      |

46/88/58

| <b>rs7975232</b> | <b>Chilean-IBD</b> | <b>All</b>      | <b>OR</b> |
|------------------|--------------------|-----------------|-----------|
|                  | <b>(N=192)</b>     | <b>(N=2504)</b> |           |
| <b>CC</b>        | 58                 | 657(26.2%)      | Reference |
| <b>AA</b>        | 46                 | 734(29.3%)      | 1.40      |
| <b>AC</b>        | 88                 | 1113(44.4%)     | 1.11      |
| <b>rs7975232</b> | <b>Chilean-IBD</b> | <b>European</b> | <b>OR</b> |
|                  | <b>(N=192)</b>     | <b>(N=503)</b>  |           |

|                  |                                |                             |           |
|------------------|--------------------------------|-----------------------------|-----------|
| CC               | 58                             | 115(22.9%)                  | Reference |
| AA               | 46                             | 170(33.8%)                  | 1.86      |
| AC               | 88                             | 218(43.3%)                  | 1.24      |
| <b>rs7975232</b> | <b>Chilean-IBD<br/>(N=192)</b> | <b>American<br/>(N=347)</b> | <b>OR</b> |
| CC               | 58                             | 116(33.4%)                  | Reference |
| AA               | 46                             | 75(21.6%)                   | 0.81      |
| AC               | 88                             | 156(45%)                    | 0.88      |
| <b>rs7975232</b> | <b>Chilean-IBD<br/>(N=192)</b> | <b>Asian<br/>(N=504)</b>    | <b>OR</b> |
| CC               | 58                             | 261(51.8%)                  | Reference |
| AA               | 46                             | 50(9.9%)                    | 0.24      |

| CI        | P value                |
|-----------|------------------------|
| Reference | 1.32x10 <sup>-14</sup> |
| 1.13-2.23 |                        |
| 3.21-7.38 |                        |
| CI        | P value                |
| Reference | 0.0001                 |
| 0.42-0.88 |                        |
| 0.21-0.58 |                        |
| CI        | P value                |
| Reference | 0.0005                 |
| 1.05-2.43 |                        |
| 1.61-4.32 |                        |
| CI        | P value                |
| Reference | 7.24x10 <sup>-11</sup> |
| 1.78-4.09 |                        |

rs12785878

| CI         | P value               |
|------------|-----------------------|
| Reference  | 0.03                  |
| 0.77-1.43  |                       |
| 1.21-4.59  |                       |
| CI         | P Value               |
| Reference  | 3.47x10 <sup>-7</sup> |
| 1.28-2.60  |                       |
| 2.60-10.45 |                       |
|            |                       |

| CI        | P Value   |
|-----------|-----------|
| Reference | 0.5       |
| 0.65-1.37 |           |
| 0.70-3.21 |           |
| CI        | P Value   |
|           | < 2.2e-16 |
| 0.14-0.32 |           |

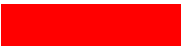

| CI         | P.value     |
|------------|-------------|
| Reference  | <2.2 x10-16 |
| 2.34-4.86  |             |
| 9.30-55.89 |             |
| CI         | P.Value     |
| Reference  | 0.0001      |
| 1.43-3.19  |             |
| 1.07-7.46  |             |
| CI         | P.Value     |
| Reference  | <2.2 x10-16 |
| 3.10-6.93  |             |
| 5.20-33.26 |             |
| CI         | P Value     |
| Reference  | 0.06        |
| 1.02-2.39  |             |
| 0.67-5.30  |             |

| CI        | P.Value |
|-----------|---------|
| Reference | 0.24    |
| 0.94-2.10 |         |
| 0.79-1.57 |         |
| CI        | P.Value |



|           |                |
|-----------|----------------|
| Reference | 0.02           |
| 1.18-2.93 |                |
| 0.83-1.86 |                |
| <b>CI</b> | <b>P.Value</b> |
| Reference | 0.69           |
| 0.50-1.32 |                |
| 0.58-1.33 |                |
| <b>CI</b> | <b>Pvalue</b>  |
| Reference | 1.56x10-8      |
| 0.14-0.39 |                |

Subsequently, presence of 5 VDR SNPs was investigated, namely FokI (rs2228570), BsmI (rs1544410), A

|    |               |          |         |   |   |   |                                        |
|----|---------------|----------|---------|---|---|---|----------------------------------------|
| 12 | seq-rs2228570 | 48272895 | ALL(NP) |   | 0 | A | 0/0/192                                |
| 12 | rs1544410     | 48239835 | ALL(NP) | A |   | G | 10/73/109                              |
|    | rs17879735    |          | no      |   |   |   |                                        |
|    | rs731236      |          | no      |   |   |   |                                        |
|    | rs757343      |          | no      |   |   |   |                                        |
| 12 | rs11568820    | 48302545 | ALL(NP) | A |   | G | 5/39/148                               |
| 12 | rs7975232     | 48238837 | ALL(NP) | A |   | C | 46/88/58                               |
|    | rs7109294     |          | no      |   |   |   |                                        |
|    | rs10896345    |          | no      |   |   |   |                                        |
|    | rs732594      |          | no      |   |   |   |                                        |
|    | rs2980        |          | no      |   |   |   | rs2228570,rs1544410,rs11568820, and rs |
|    | rs2980        |          | no      |   |   |   |                                        |

| Chromosome 12 |            |            |           |            |
|---------------|------------|------------|-----------|------------|
|               | rs1544410  | rs7975232  | rs2228570 | rs11568820 |
| 12 rs1544410  |            | 1 0.36     |           | 0.05       |
| rs7975232     | 0.36       |            | 1         | 0.02       |
| rs2228570     |            |            |           | 1          |
| rs11568820    | 0.05       | 0.02       |           | 1          |
| Chromosome 11 |            |            |           |            |
|               | rs10741657 | rs12785878 |           |            |
| rs10741657    |            | 1 0.01     |           |            |
| rs12785878    | 0.01       |            | 1         |            |

AlpaI (rs17879735), TaqI (rs731236), and Tru9I (rs757343). Polymorphisms were identified with th

|        |        |        |
|--------|--------|--------|
| 0.0    | 0.0    | 1.0    |
| 0.3802 | 0.3671 | 0.6981 |

|        |        |        |
|--------|--------|--------|
| 0.2031 | 0.2226 | 0.2018 |
| 0.4583 | 0.498  | 0.3099 |

rs7975232.

12 seq-rs222857 48272895

ie restriction di- gest of PCR products.

ALL(NP)

0 A

0/0/192

| patient | rs11568820 | rs1544410 | rs7975232 | seq.rs2228570 | rs10741657 | rs12785878 |
|---------|------------|-----------|-----------|---------------|------------|------------|
| 1       | GG         | GG        | AC        | AA            | GG         | TT         |
| 103     | GG         | AA        | AA        | AA            | GG         | TT         |
| 106     | GG         | GG        | CC        | AA            | GG         | GT         |
| 109     | GG         | AG        | AC        | AA            | GG         | TT         |
| 114     | GG         | GG        | CC        | AA            | GG         | TT         |
| 117     | GG         | AG        | AC        | AA            | GG         | GG         |
| 122     | GG         | AG        | AC        | AA            | GG         | GT         |
| 125     | GG         | GG        | AA        | AA            | GG         | GG         |
| 13      | GG         | GG        | CC        | AA            | GG         | GT         |
| 133     | GG         | GG        | CC        | AA            | GG         | TT         |
| 143     | GG         | GG        | CC        | AA            | GG         | GT         |
| 154     | GG         | AG        | AA        | AA            | GG         | GT         |
| 161     | GG         | AG        | AA        | AA            | GG         | GT         |
| 164     | AG         | AG        | AC        | AA            | GG         | GT         |
| 169     | GG         | GG        | AC        | AA            | GG         | TT         |
| 17      | AG         | GG        | CC        | AA            | GG         | GG         |
| 173     | GG         | GG        | CC        | AA            | GG         | TT         |
| 177     | GG         | AG        | AA        | AA            | GG         | TT         |
| 184     | GG         | AG        | AC        | AA            | GG         | TT         |
| 189     | GG         | GG        | AA        | AA            | GG         | GT         |
| 19      | GG         | GG        | AC        | AA            | GG         | GG         |
| 196     | GG         | AG        | AA        | AA            | GG         | TT         |
| 202     | GG         | GG        | AC        | AA            | GG         | GT         |
| 207     | GG         | AG        | AC        | AA            | GG         | GG         |
| 209     | GG         | GG        | AC        | AA            | GG         | TT         |
| 21      | GG         | GG        | CC        | AA            | GG         | GG         |
| 22      | AG         | AA        | AA        | AA            | GG         | GT         |
| 27      | GG         | GG        | AC        | AA            | GG         | GT         |
| 30      | AG         | GG        | AC        | AA            | GG         | GG         |
| 31      | GG         | AG        | AC        | AA            | GG         | GT         |
| 36      | GG         | GG        | CC        | AA            | GG         | GG         |
| 40      | GG         | GG        | AC        | AA            | GG         | GT         |
| 48      | AG         | GG        | AA        | AA            | GG         | GT         |
| 56      | GG         | GG        | CC        | AA            | GG         | GT         |
| 58      | GG         | AG        | AC        | AA            | GG         | GT         |
| 59      | AG         | AG        | AA        | AA            | GG         | TT         |
| 62      | GG         | AG        | AA        | AA            | GG         | GT         |
| 65      | GG         | GG        | CC        | AA            | GG         | GT         |
| 68      | GG         | GG        | AC        | AA            | GG         | TT         |
| 7       | GG         | GG        | CC        | AA            | GG         | GT         |
| 71      | GG         | AG        | AC        | AA            | GG         | GT         |
| 76      | GG         | GG        | AC        | AA            | GG         | GG         |

|    |    |    |    |    |    |    |
|----|----|----|----|----|----|----|
| 79 | AG | AG | AC | AA | GG | GT |
| 80 | GG | GG | CC | AA | GG | TT |
| 82 | GG | GG | CC | AA | GG | GT |
| 90 | GG | AG | AC | AA | GG | GT |
| 91 | GG | AG | AC | AA | GG | TT |
| 92 | GG | GG | AC | AA | GG | GT |
| 93 | AG | AG | AC | AA | GG | GT |
| 95 | GG | AG | AA | AA | GG | GT |
| 97 | GG | GG | CC | AA | GG | TT |

| rs2282679 | rs4988235 | id  |
|-----------|-----------|-----|
| AA        | CC        | 1   |
| AA        | CC        | 103 |
| AA        | CC        | 106 |
| CA        | CC        | 109 |
| AA        | CC        | 114 |
| CA        | CC        | 117 |
| CA        | CC        | 122 |
| AA        | CC        | 125 |
| AA        | CC        | 13  |
| CA        | CC        | 133 |
| CA        | CC        | 143 |
| CA        | CC        | 154 |
| CA        | CC        | 161 |
| CC        | CC        | 164 |
| AA        | CC        | 169 |
| AA        | CC        | 17  |
| CA        | CC        | 173 |
| CC        | CC        | 177 |
| AA        | CC        | 184 |
| AA        | CC        | 189 |
| AA        | CC        | 19  |
| CA        | CC        | 196 |
| CA        | CC        | 202 |
| AA        | CC        | 207 |
| AA        | CC        | 209 |
| AA        | CC        | 21  |
| AA        | CC        | 22  |
| CA        | CC        | 27  |
| AA        | CC        | 30  |
| CA        | CC        | 31  |
| AA        | CC        | 36  |
| AA        | CC        | 40  |
| CA        | CC        | 48  |
| AA        | CC        | 56  |
| AA        | CC        | 58  |
| CC        | CC        | 59  |
| CA        | CC        | 62  |
| AA        | CC        | 65  |
| AA        | CC        | 68  |
| AA        | CC        | 7   |
| CA        | CC        | 71  |
| AA        | CC        | 76  |

|    |    |    |
|----|----|----|
| AA | CC | 79 |
| AA | CC | 80 |
| CA | CC | 82 |
| AA | CC | 90 |
| CA | CC | 91 |
| AA | CC | 92 |
| AA | CC | 93 |
| CA | CC | 95 |
| CA | CC | 97 |



rs2228570,r  
s1544410,rs  
17879735,rs  
731236,rs75  
7343  
,rs11568820  
,rs7975232,r  
s7109294,rs  
10896349,rs  
732594,

rs2228570  
rs1544410  
rs17879735  
rs731236  
rs757343  
rs11568820  
rs7975232  
rs7109294

rs10896349  
rs732594  
rs2980

rs2228570 rs2980

rs1544410  
rs17879735  
rs731236  
rs757343  
rs11568820  
rs7975232  
rs7109294

rs10896349  
rs732594  
rs2980
